# Supplementary material for: Patterns of brain asymmetry associated with polygenic risks for autism and schizophrenia implicate language and executive functions but not brain masculinization
Source: PubMed Central journal article supplement (PMC8872997; doi:10.1038/s41380-021-01204-z), 2021-07-01
Supplement: 41380_2021_1204_MOESM1_ESM.pdf [file 41380_2021_1204_MOESM1_ESM.pdf]

## **Supplementary information**

**Sha et al. Patterns of brain asymmetry associated with polygenic risks for autism and schizophrenia implicate language and executive functions but not brain masculinization**

### **Contents**

**Supplementary Figures 1-5, pages 2-6.**

**Supplementary Tables 1-7:** See separate spreadsheet file for supplementary tables.

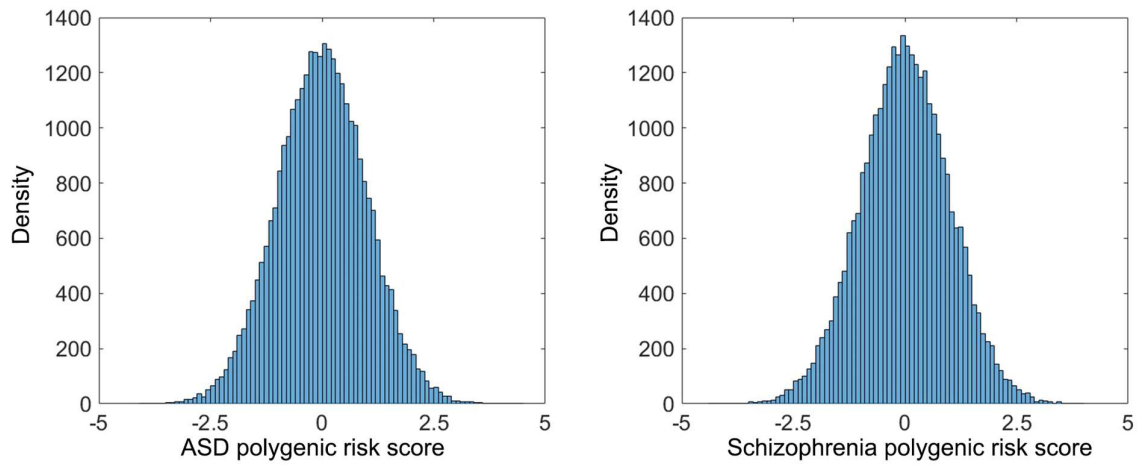

**Supplementary Figure 1.** Frequency histograms of the ASD and schizophrenia polygenic risk scores in 32,256 participants of the UK Biobank brain imaging genetics dataset.

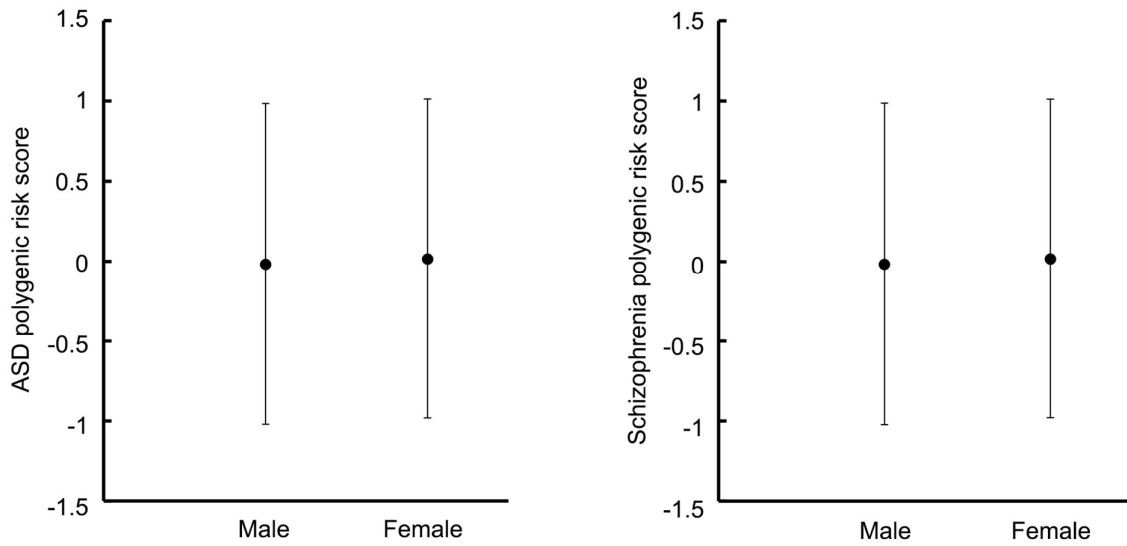

**Supplementary Figure 2.** Means and standard deviations of ASD and schizophrenia polygenic risk scores, separately in males and females.

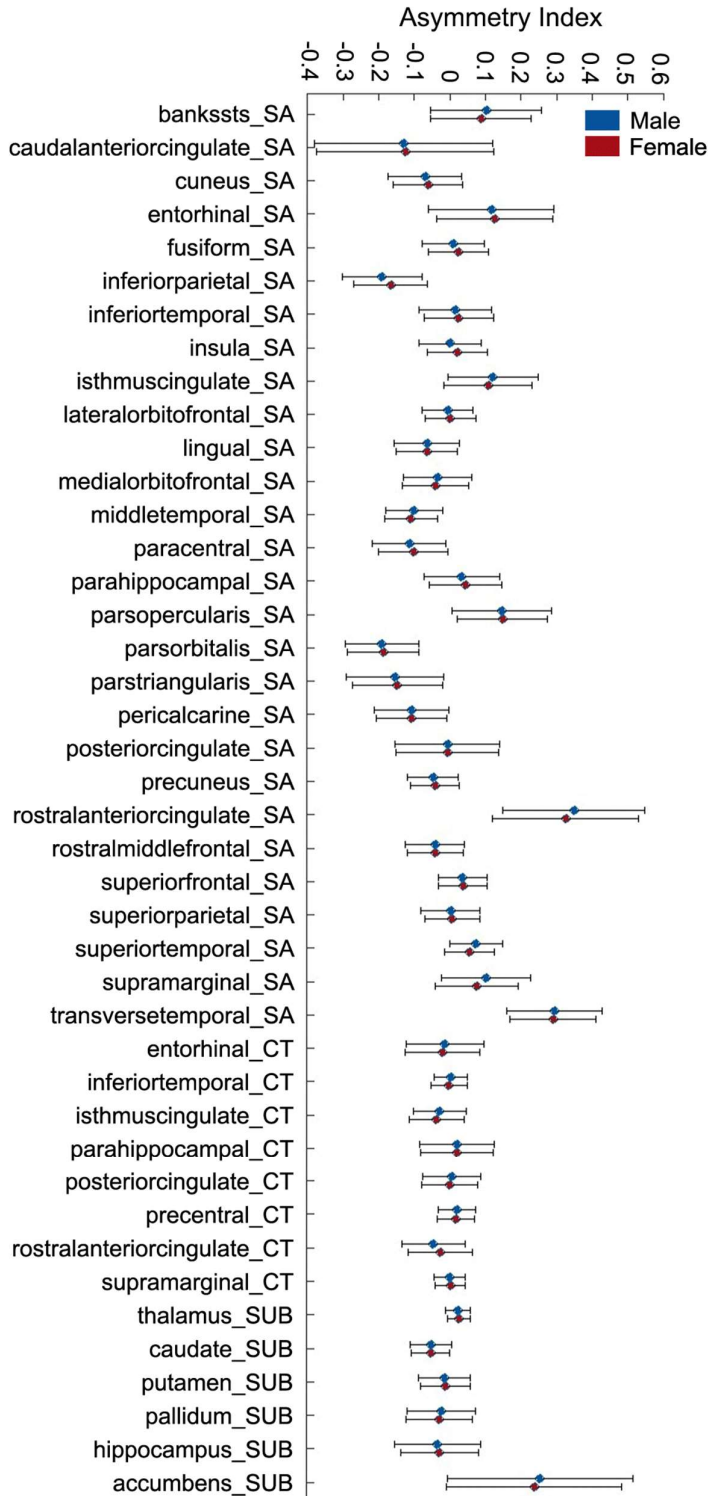

**Supplementary Figure 3.** Means and standard deviations of brain regional asymmetry indexes, separately in males and females. Abbreviations: SA: surface area; CT: cortical thickness; SUB: subcortical volume.

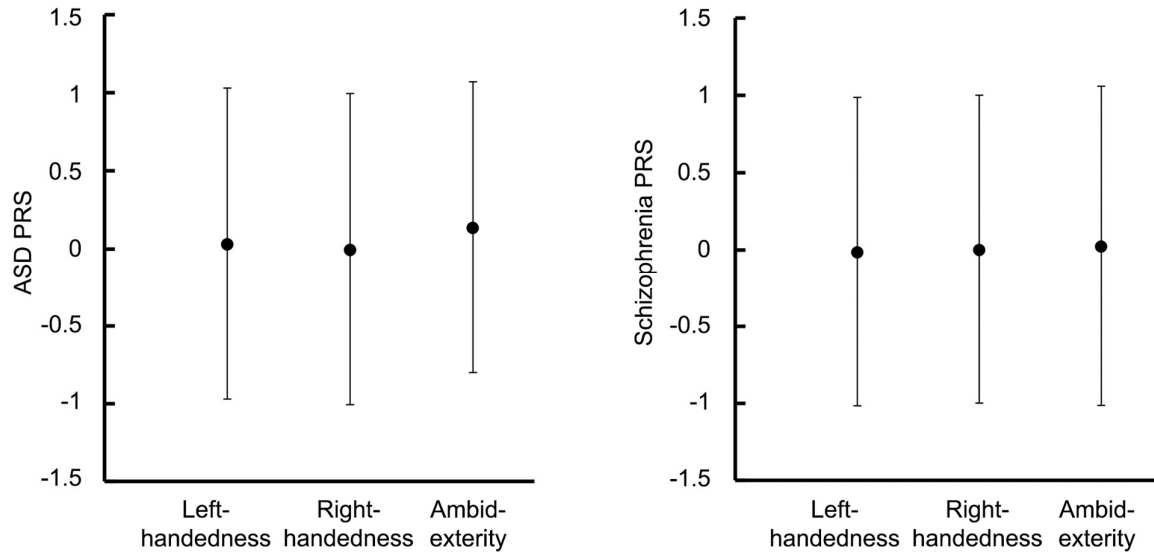

**Supplementary Figure 4.** Means and standard deviations of polygenic risk scores for ASD and schizophrenia, plotted separately by handedness groups.

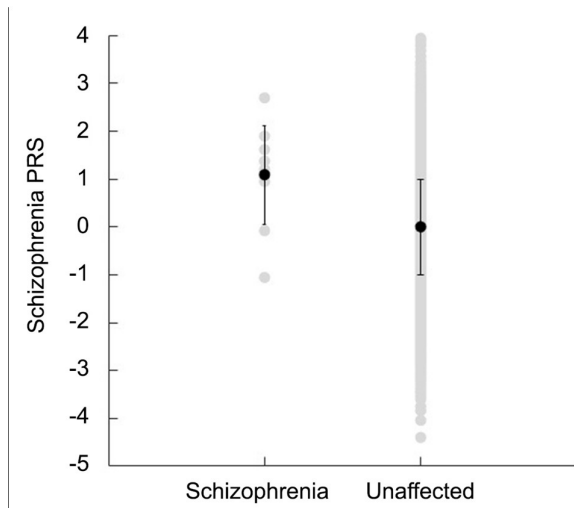

**Supplementary Figure 5.** Polygenic risk scores (PRS) for schizophrenia in 10 individuals with the diagnosis ‘secondary ICD10: F20.9 Schizophrenia, unspecified’, versus 32,245 unaffected individuals in the dataset. Individuals are shown by grey circles, means and standard deviations in black.
